# Supplementary material
Source: MDPI journal article supplement (https://www.mdpi.com/2073-4441/13/18/2554)
Supplement: s1 [file s1]

## Supporting Information

# Sheet-like Skeleton Carbon Derived from Shaddock Peels with Hierarchically Porous Structures for Ultra-Fast Removal of Methylene Blue

Panlong Dong <sup>1</sup>, Hailin Liu <sup>1</sup>, Shengrui Xu <sup>1,\*</sup>, Changpo Chen <sup>1</sup>, Suling Feng <sup>1</sup> and Anying Long <sup>2,\*</sup>

<sup>1</sup> Key Laboratory of Green Chemical Media and Reactions, Ministry of Education, Collaborative Innovation Center of Henan Province for Green Manufacturing of Fine Chemicals, School of Chemistry and Chemical Engineering, Henan Normal University, Xinxiang 453007, China; pldong2000@163.com (P.D.); LiuHailin20211001@163.com (H.L.); andychen2005@163.com (C.C.); slfeng@htu.cn (S.F.)

<sup>2</sup> 113 Geological Brigade, Guizhou Bureau of Geology and Mineral Resources, Liupanshui 553000, China

\* Correspondence: xushengrui@126.com (S.X.); longying031042@163.com (A.L.)

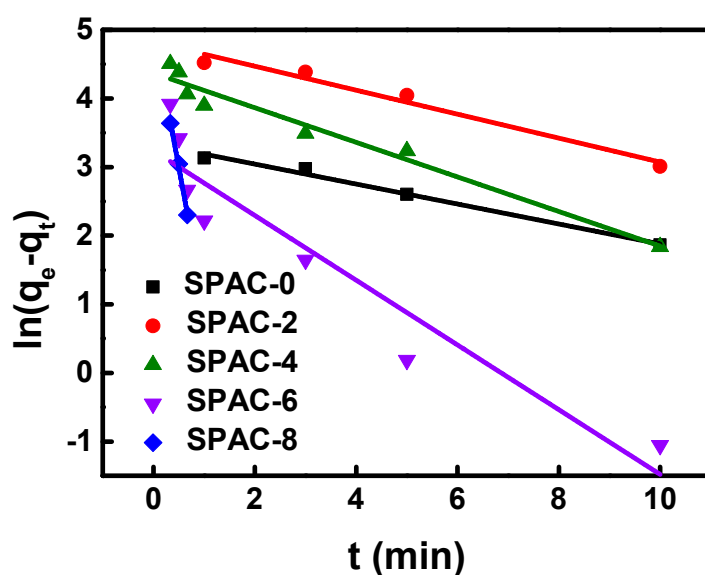

Figure S1. Pseudo-first-order kinetic fitting curves for MB adsorption onto SPACs

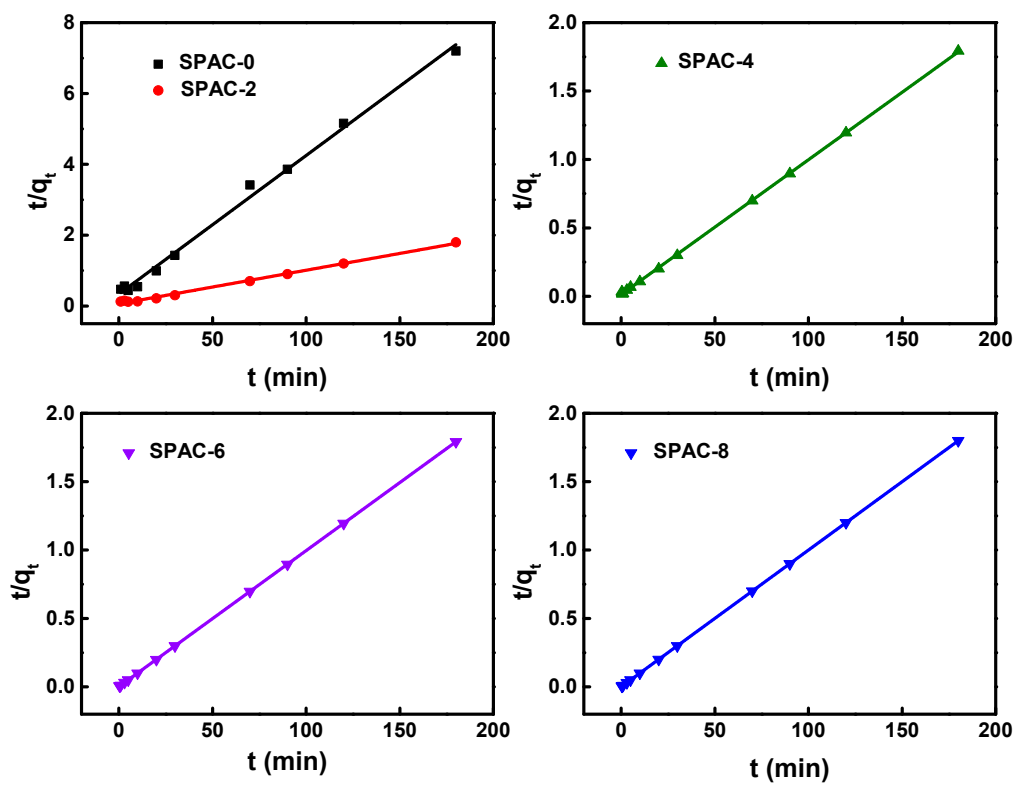

Figure S2. Pseudo-second-order kinetic fitting curves for MB adsorption onto SPACs

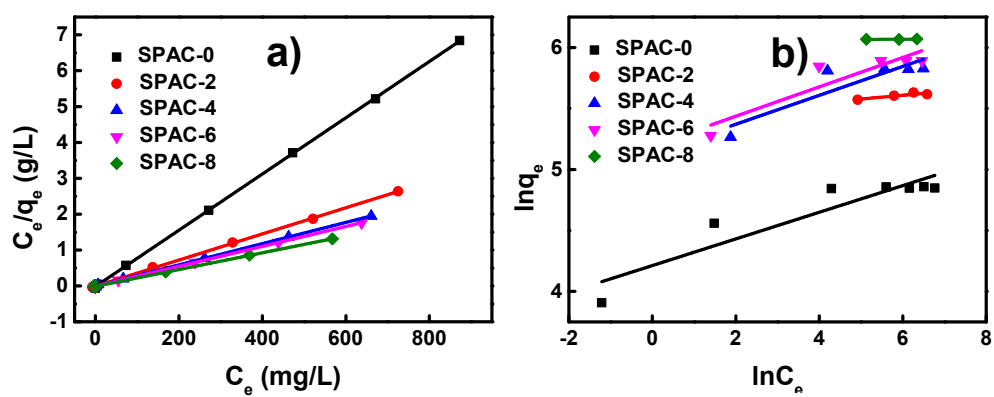

Figure S3. Fitting curves for MB adsorption onto SPACs based on Langmuir (a) and Freundlich (b) isotherms.
